# Supplementary material
Source: PubMed Central journal article supplement (PMC6504616)
Supplement: NIHMS1525289-supplement-1.pdf [file NIHMS1525289-supplement-1.pdf]

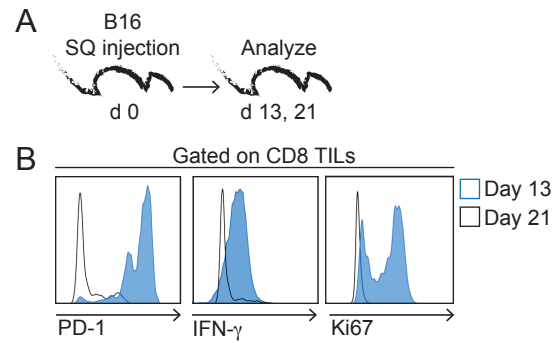

**Supplemental Fig. 1.** CD8 TILs display diminished expression of activation/inhibitory receptors and function with increasing tumor progression. A) Experimental design. Tumors were harvested at indicated time points after inoculation and CD8 TILs analyzed. B) Representative histogram of PD-1, IFN- $\gamma$ , and Ki67 expression of CD8 TILs 13 (blue) or 21 (black) days after tumor inoculation.

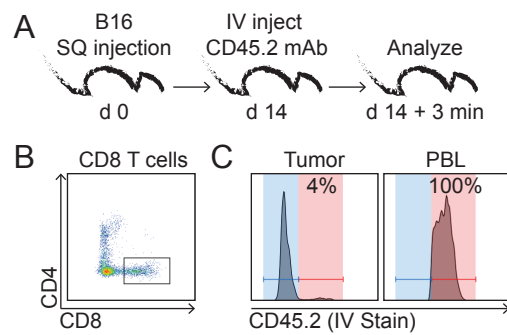

**Supplemental Fig. 2.** The majority of CD8 T cells in B16 tumors are vasculature-excluded. A) Experimental design. Mice received IV injection of CD45.2-fluorescent mAb 14 days after tumor inoculation and then tissues of interest harvested. B) Representative gating of CD8<sup>+</sup> cells in tumor samples. C) Representative histogram of CD45.2 IV labeling of CD8 T cells in tumor (left) and blood (right) samples.
